# Supplementary material for: Zn-doped Mono- and Biphasic Calcium Phosphate Materials Derived from Agriculture Waste and Their Potential Biomedical Applications: Part I
Source: MDPI journal article supplement (doi:10.3390/ma16051971), 2023-02-28
Supplement: s1 [file s1]

Article

# Zn-Doped Mono- and Biphasic Calcium Phosphate Materials Derived from Agriculture Waste and Their Potential Biomedical Applications: Part I

Marta Kalbarczyk, Aleksandra Szczes, Anna Belcarz, Paulina Kazimierczak and Zoltan May

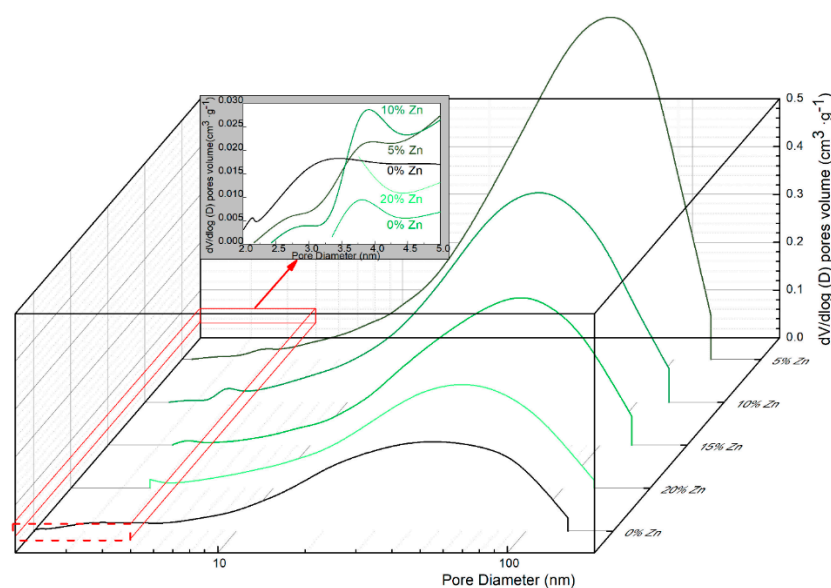

**Figure S1.** Pore size distribution of the obtained materials without Zn (0% Zn) as well as doped with initial 5, 10, 15 and 20 mol % of Zn.

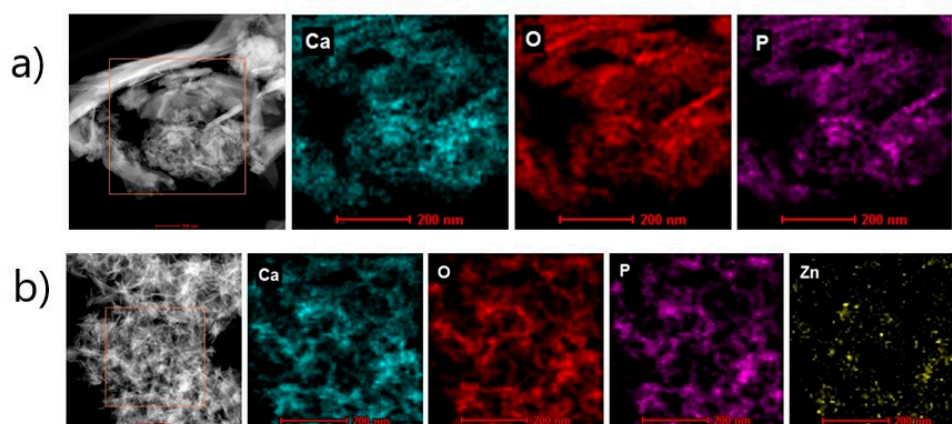

**Figure S2.** TEM image and TEM-EDS profile of the: a) 0% Zn sample, b) 10% Zn sample.
